# Supplementary material for: Loss of Inpp5d has disease‐relevant and sex‐specific effects on glial transcriptomes
Source: PubMed Central journal article supplement (PMC11350029; doi:10.1002/alz.13901), 2024-06-26
Supplement: ALZ-20-5311-s003.pdf [file ALZ-20-5311-s003.pdf]

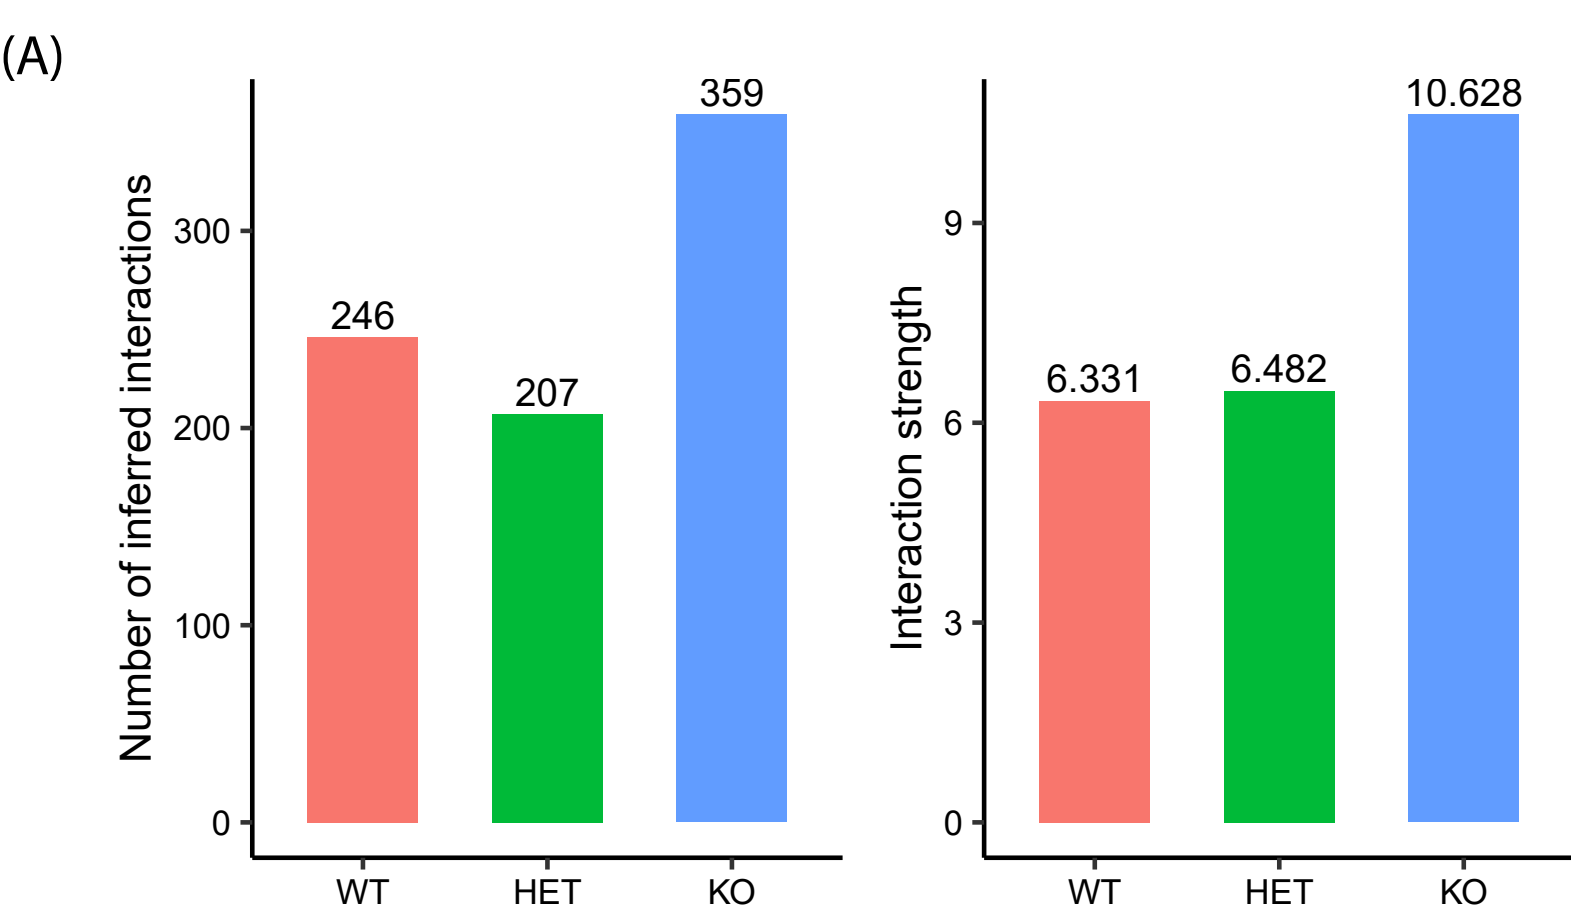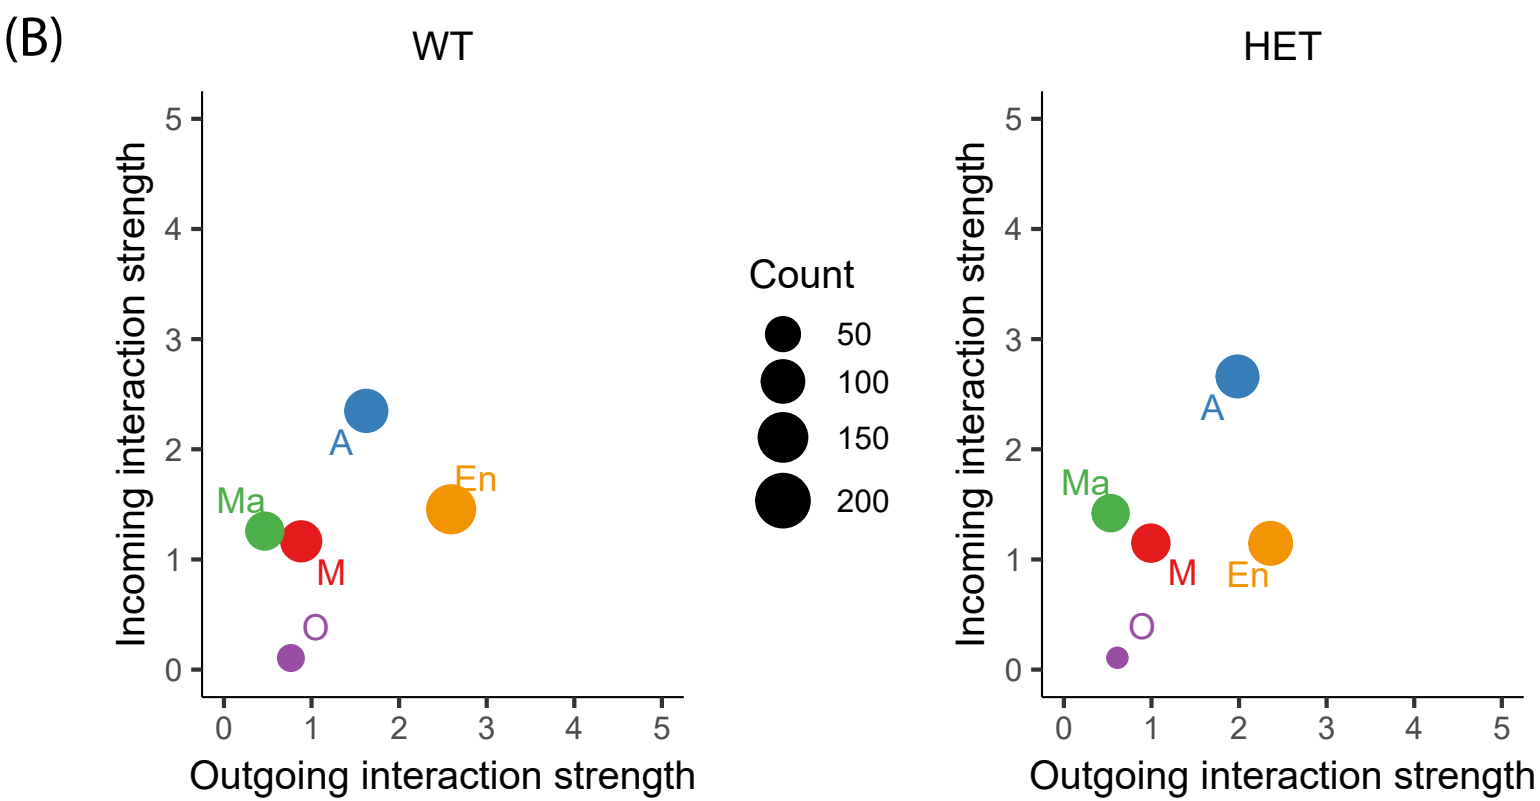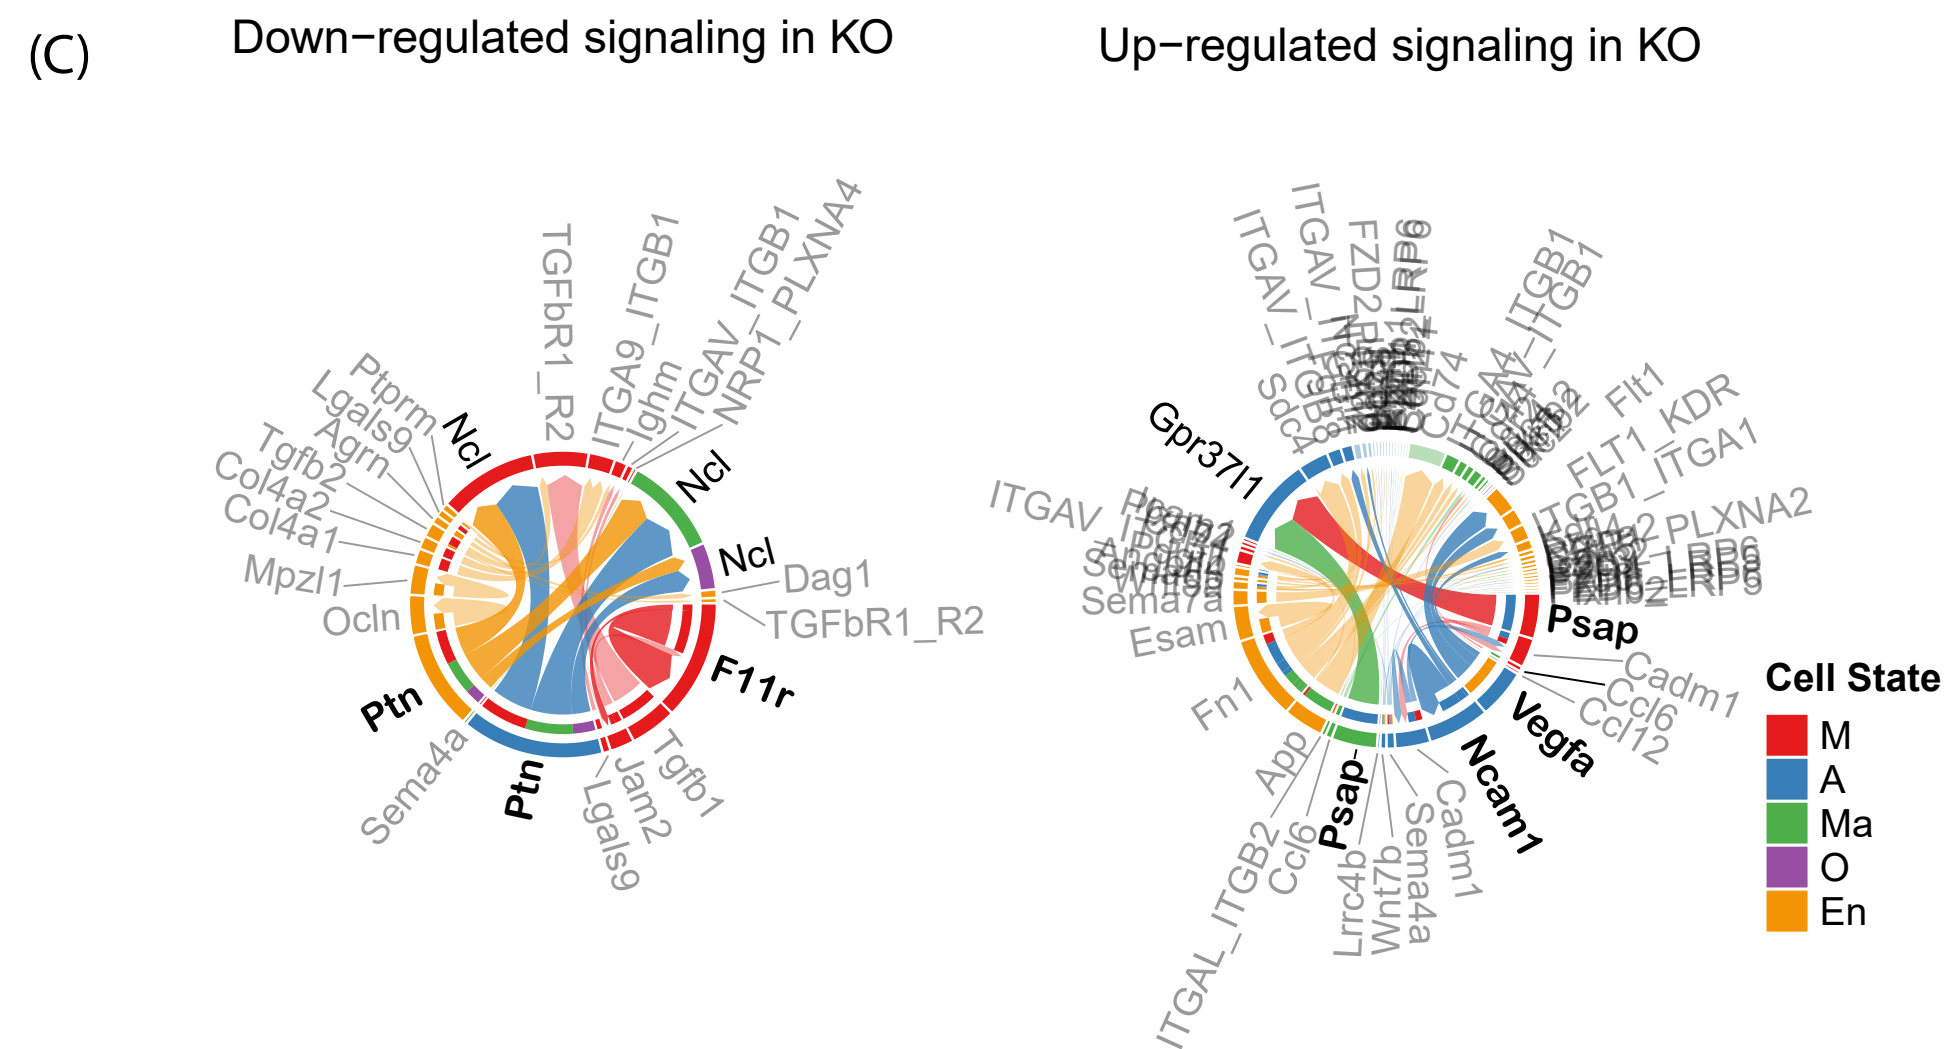

**SUPPLEMENTARY FIGURE 9: Total loss of *Inpp5d* increases global signalling between cell types in male mice.** (A) The number and strength of inferred interactions increases on homozygous loss of *Inpp5d* in male mice. (B) Numbers and strengths of incoming and/or outgoing interactions increase in all cell types on total loss of *Inpp5d* in male mice. (C) Chord plots showing pathways with decreased and increased signalling in *Inpp5d*<sup>-/-</sup> mice compared to wildtype. Plot circumference shows outgoing signalling from cell type (outer band) to recipient cell type (inner band). Width of outer bands represents numbers of cells per pathway. All pathways shown are significantly dysregulated, some bands are emphasised for the purpose of visualisation.
