# Supplementary material for: Loss of Inpp5d has disease‐relevant and sex‐specific effects on glial transcriptomes
Source: PubMed Central journal article supplement (PMC11350029; doi:10.1002/alz.13901), 2024-06-26
Supplement: ALZ-20-5311-s004.pdf [file ALZ-20-5311-s004.pdf]

# Inpp5d\_UCell

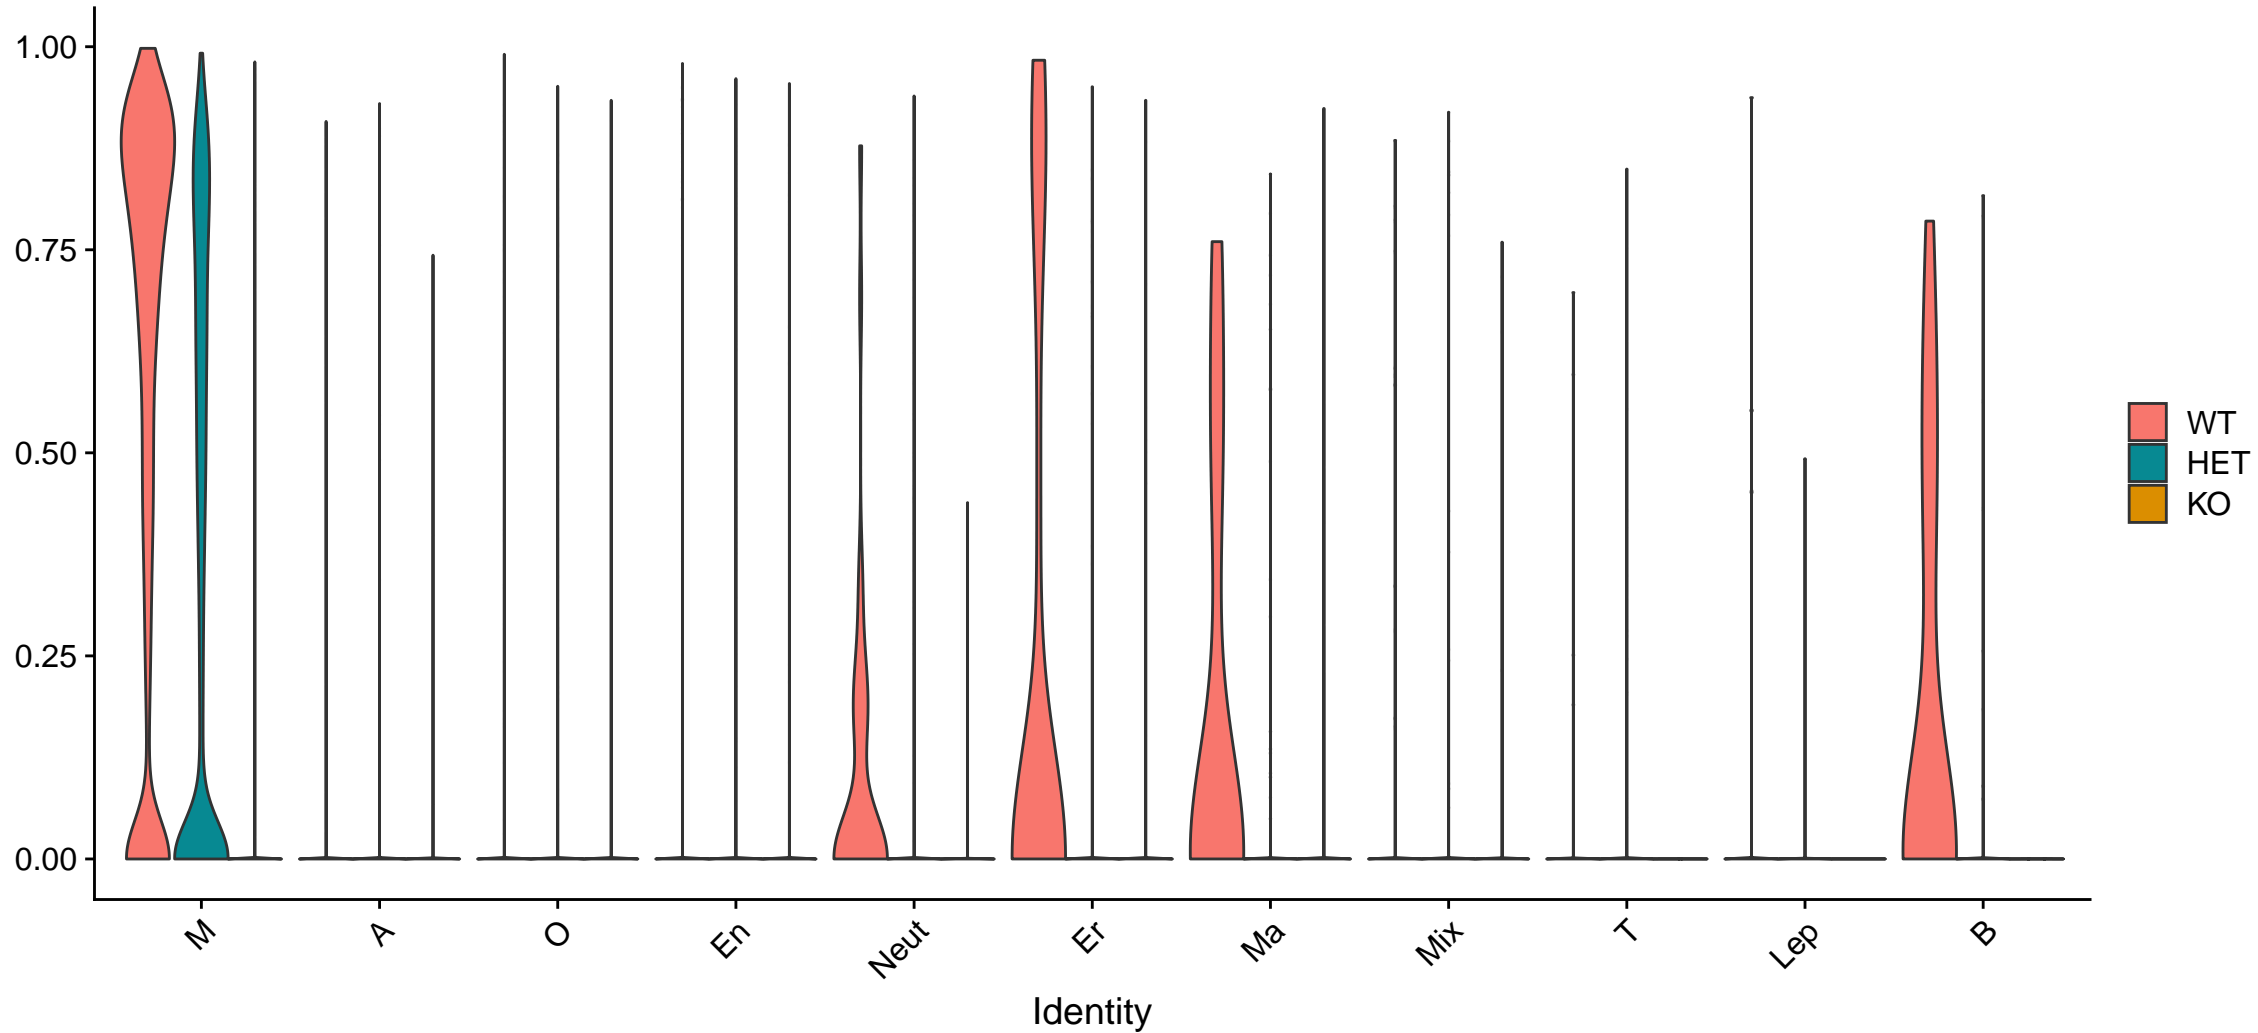

**SUPPLEMENTARY FIGURE 1: *Inpp5d* is only expressed in myeloid cells and erythrocytes in the mouse brain.** UCell Module scores of *Inpp5d* expression across all cell types identified in Figure 1. *Inpp5d* is not expressed in astrocytes, oligodendrocytes, endothelial or leptomeningeal cells. Heterozygote (HET) and homozygote knockouts (KO) express decreasing levels of *Inpp5d* (to complete depletion in KO mice) compared to wildtype (WT) mice.
