# Supplementary material for: Loss of Inpp5d has disease‐relevant and sex‐specific effects on glial transcriptomes
Source: PubMed Central journal article supplement (PMC11350029; doi:10.1002/alz.13901), 2024-06-26
Supplement: ALZ-20-5311-s005.pdf [file ALZ-20-5311-s005.pdf]

**SUPPLEMENTARY FIGURE 7:** Heatmap of Gene Ontology enrichment analysis of all lists of DEGs shown in Extended Figure 3 with KEGG terms (P-value adjustment performed using the Benjamini-Hochberg method, all significantly enriched terms are shown per comparison – none were excluded).
