# Supplementary material for: Loss of Inpp5d has disease‐relevant and sex‐specific effects on glial transcriptomes
Source: PubMed Central journal article supplement (PMC11350029; doi:10.1002/alz.13901), 2024-06-26
Supplement: ALZ-20-5311-s007.pdf [file ALZ-20-5311-s007.pdf]

# Male Other Cluster Markers

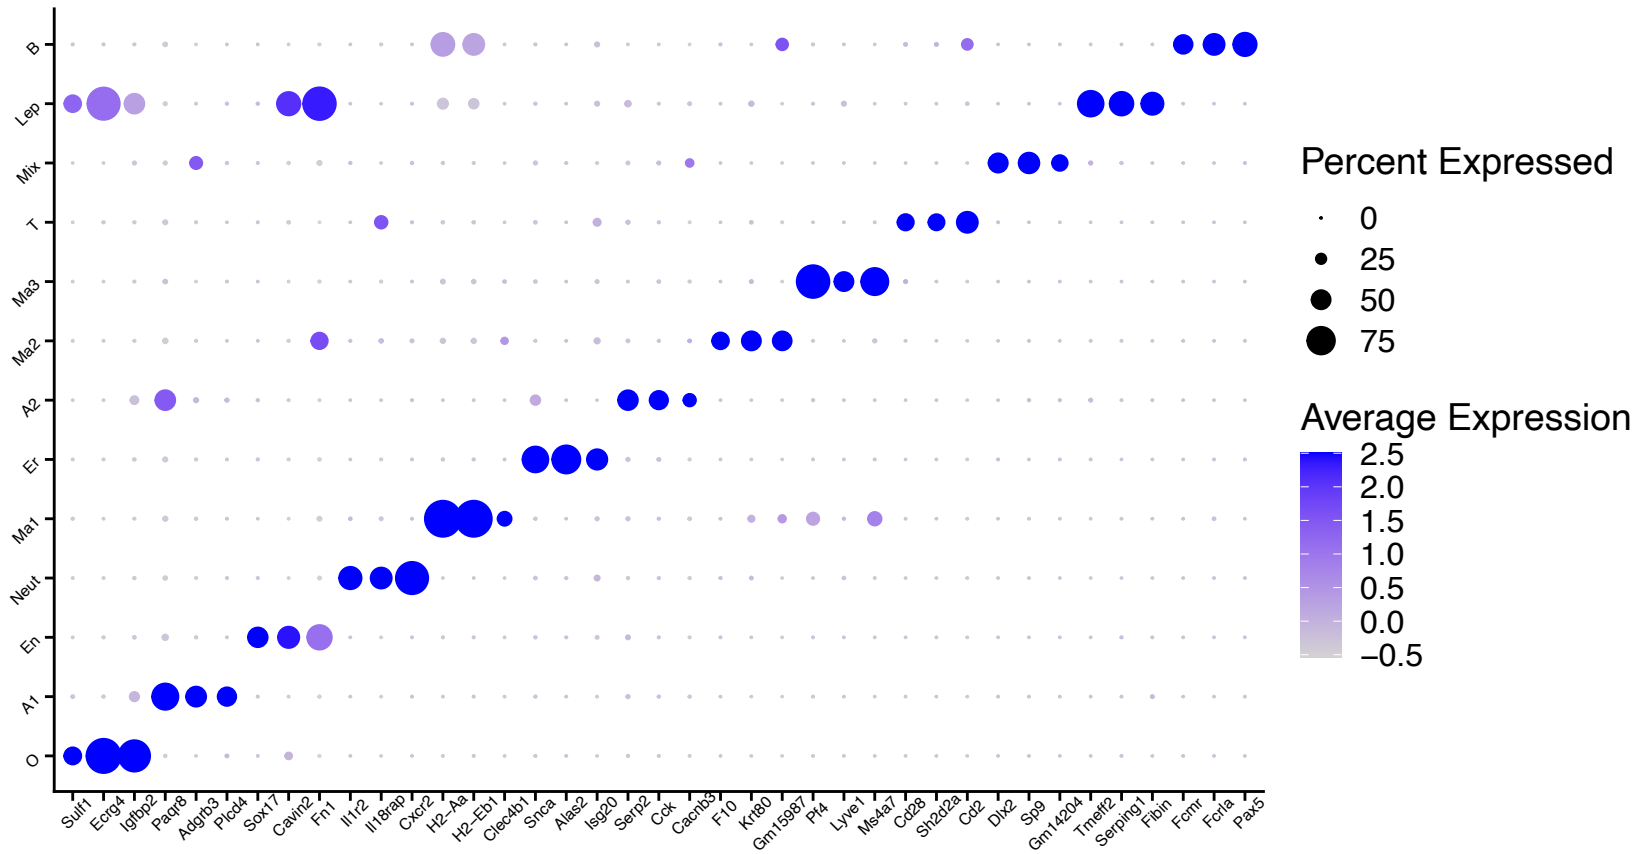

**SUPPLEMENTARY FIGURE 4: MALE CLUSTER GENES.** The y-axes show clusters of microglia (M1-12), and non-microglial cells (Oligodendrocytes, Astrocytes, Endothelial cells, Neutrophils, Macrophages, Erythrocytes, T-cells, Mixed cells, Leptomeningeal cells and B-cells and) and the x-axes show significantly associated marker genes. The size of the dots indicates the percentage of cells in each cluster expressing a particular gene, and the color is shaded based on average expression of that gene compared to the average scaled expression of all genes per cell.
