# Supplementary material for: Loss of Inpp5d has disease‐relevant and sex‐specific effects on glial transcriptomes
Source: PubMed Central journal article supplement (PMC11350029; doi:10.1002/alz.13901), 2024-06-26
Supplement: ALZ-20-5311-s011.pdf [file ALZ-20-5311-s011.pdf]

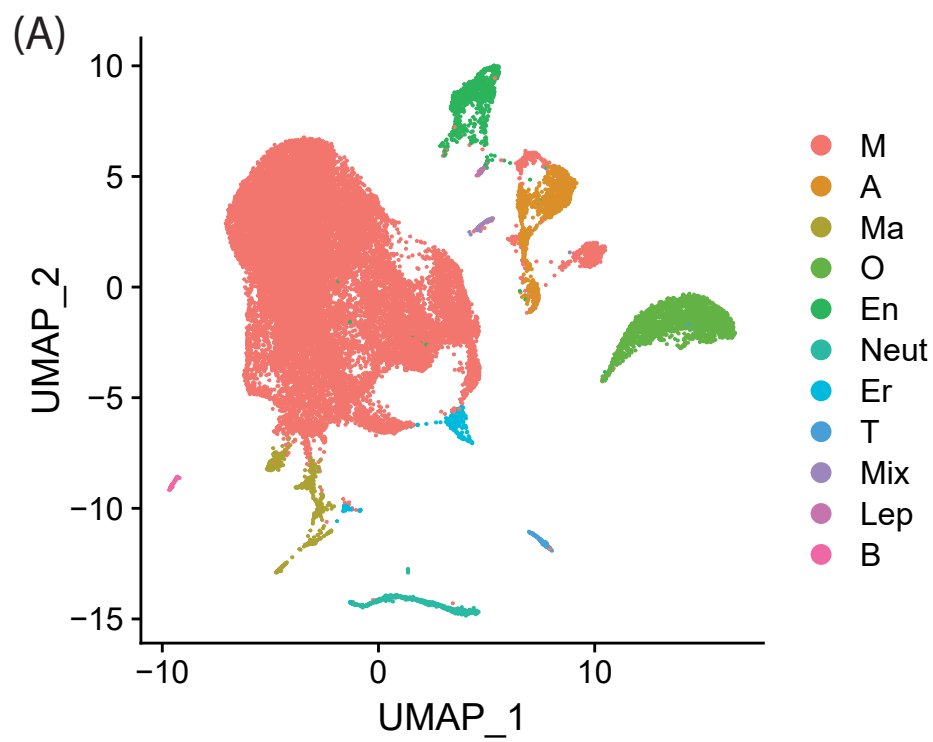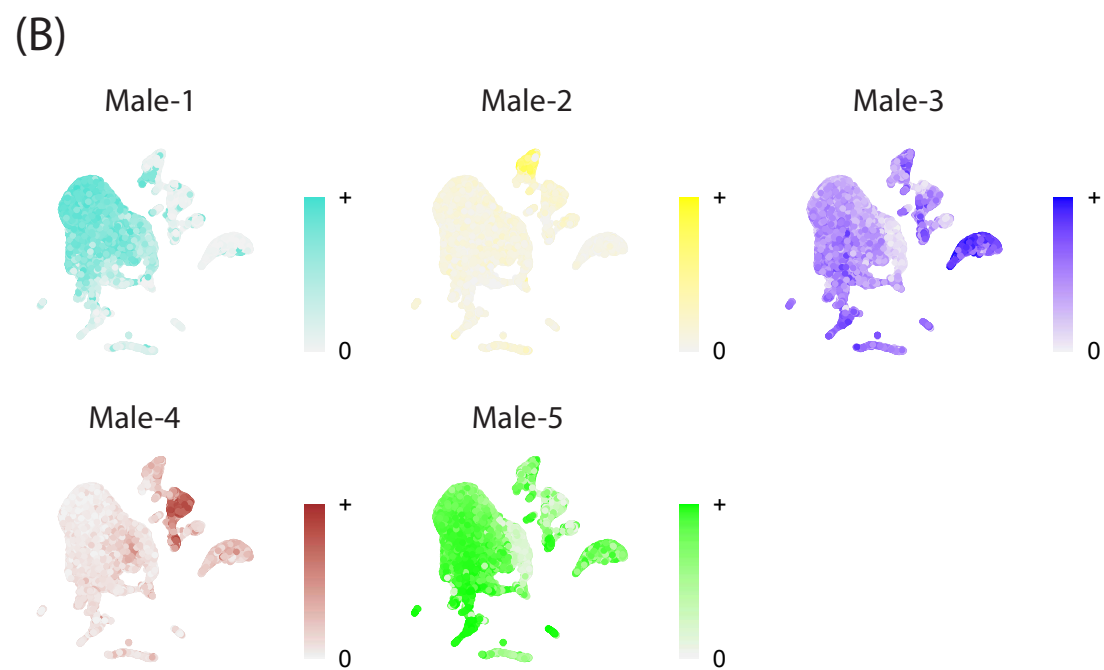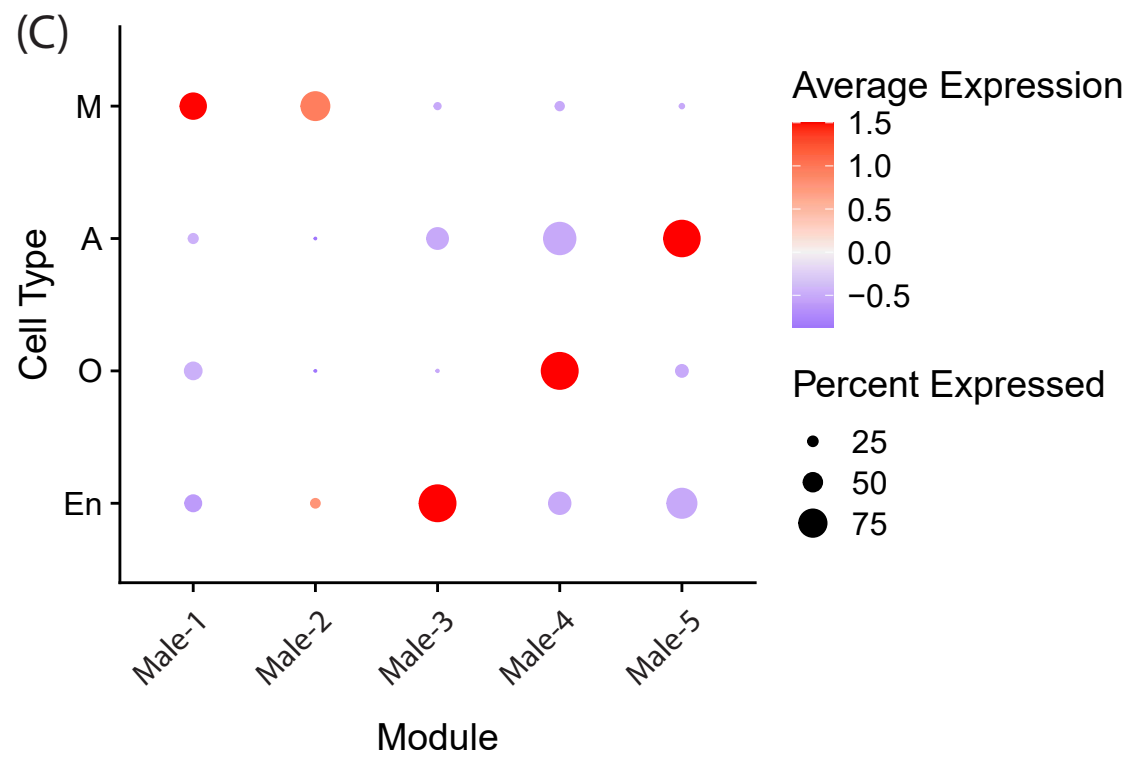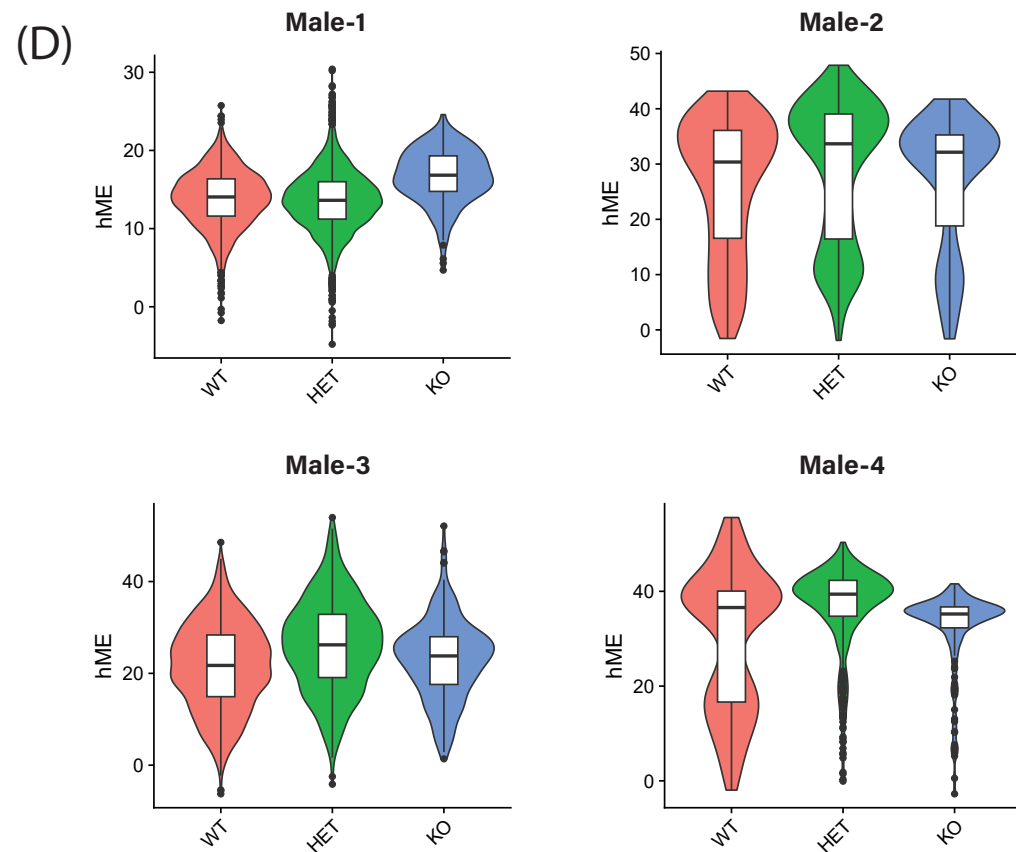

**SUPPLEMENTARY FIGURE 8: High-dimensional WGCNA reveals cell-type specific co-expression gene modules in male mice, including a microglial module with *Inpp5d* at its center.** (A) UMAP showing 11 clusters of merged cell-types. The four largest clusters - microglia (M), astrocytes (A), oligodendrocytes (O) and endothelial cells (En) - were used in this analysis. (B) Feature plot of expression of Hub genes (top 10% of genes as ranked using Maximal Clique Centrality) per module (Male 1-5). (C) Dotplot showing scaled expression of each module across cell types. Average scaled expression level scales with blue (low) to red (high) shading. Size of dots represents the percent of cells in each cell type expressing the module. (D) Eigenvalues of the first four modules across genotypes.
