# Supplementary material for: Loss of Inpp5d has disease‐relevant and sex‐specific effects on glial transcriptomes
Source: PubMed Central journal article supplement (PMC11350029; doi:10.1002/alz.13901), 2024-06-26
Supplement: ALZ-20-5311-s015.pdf [file ALZ-20-5311-s015.pdf]

**(A)****FEMALE**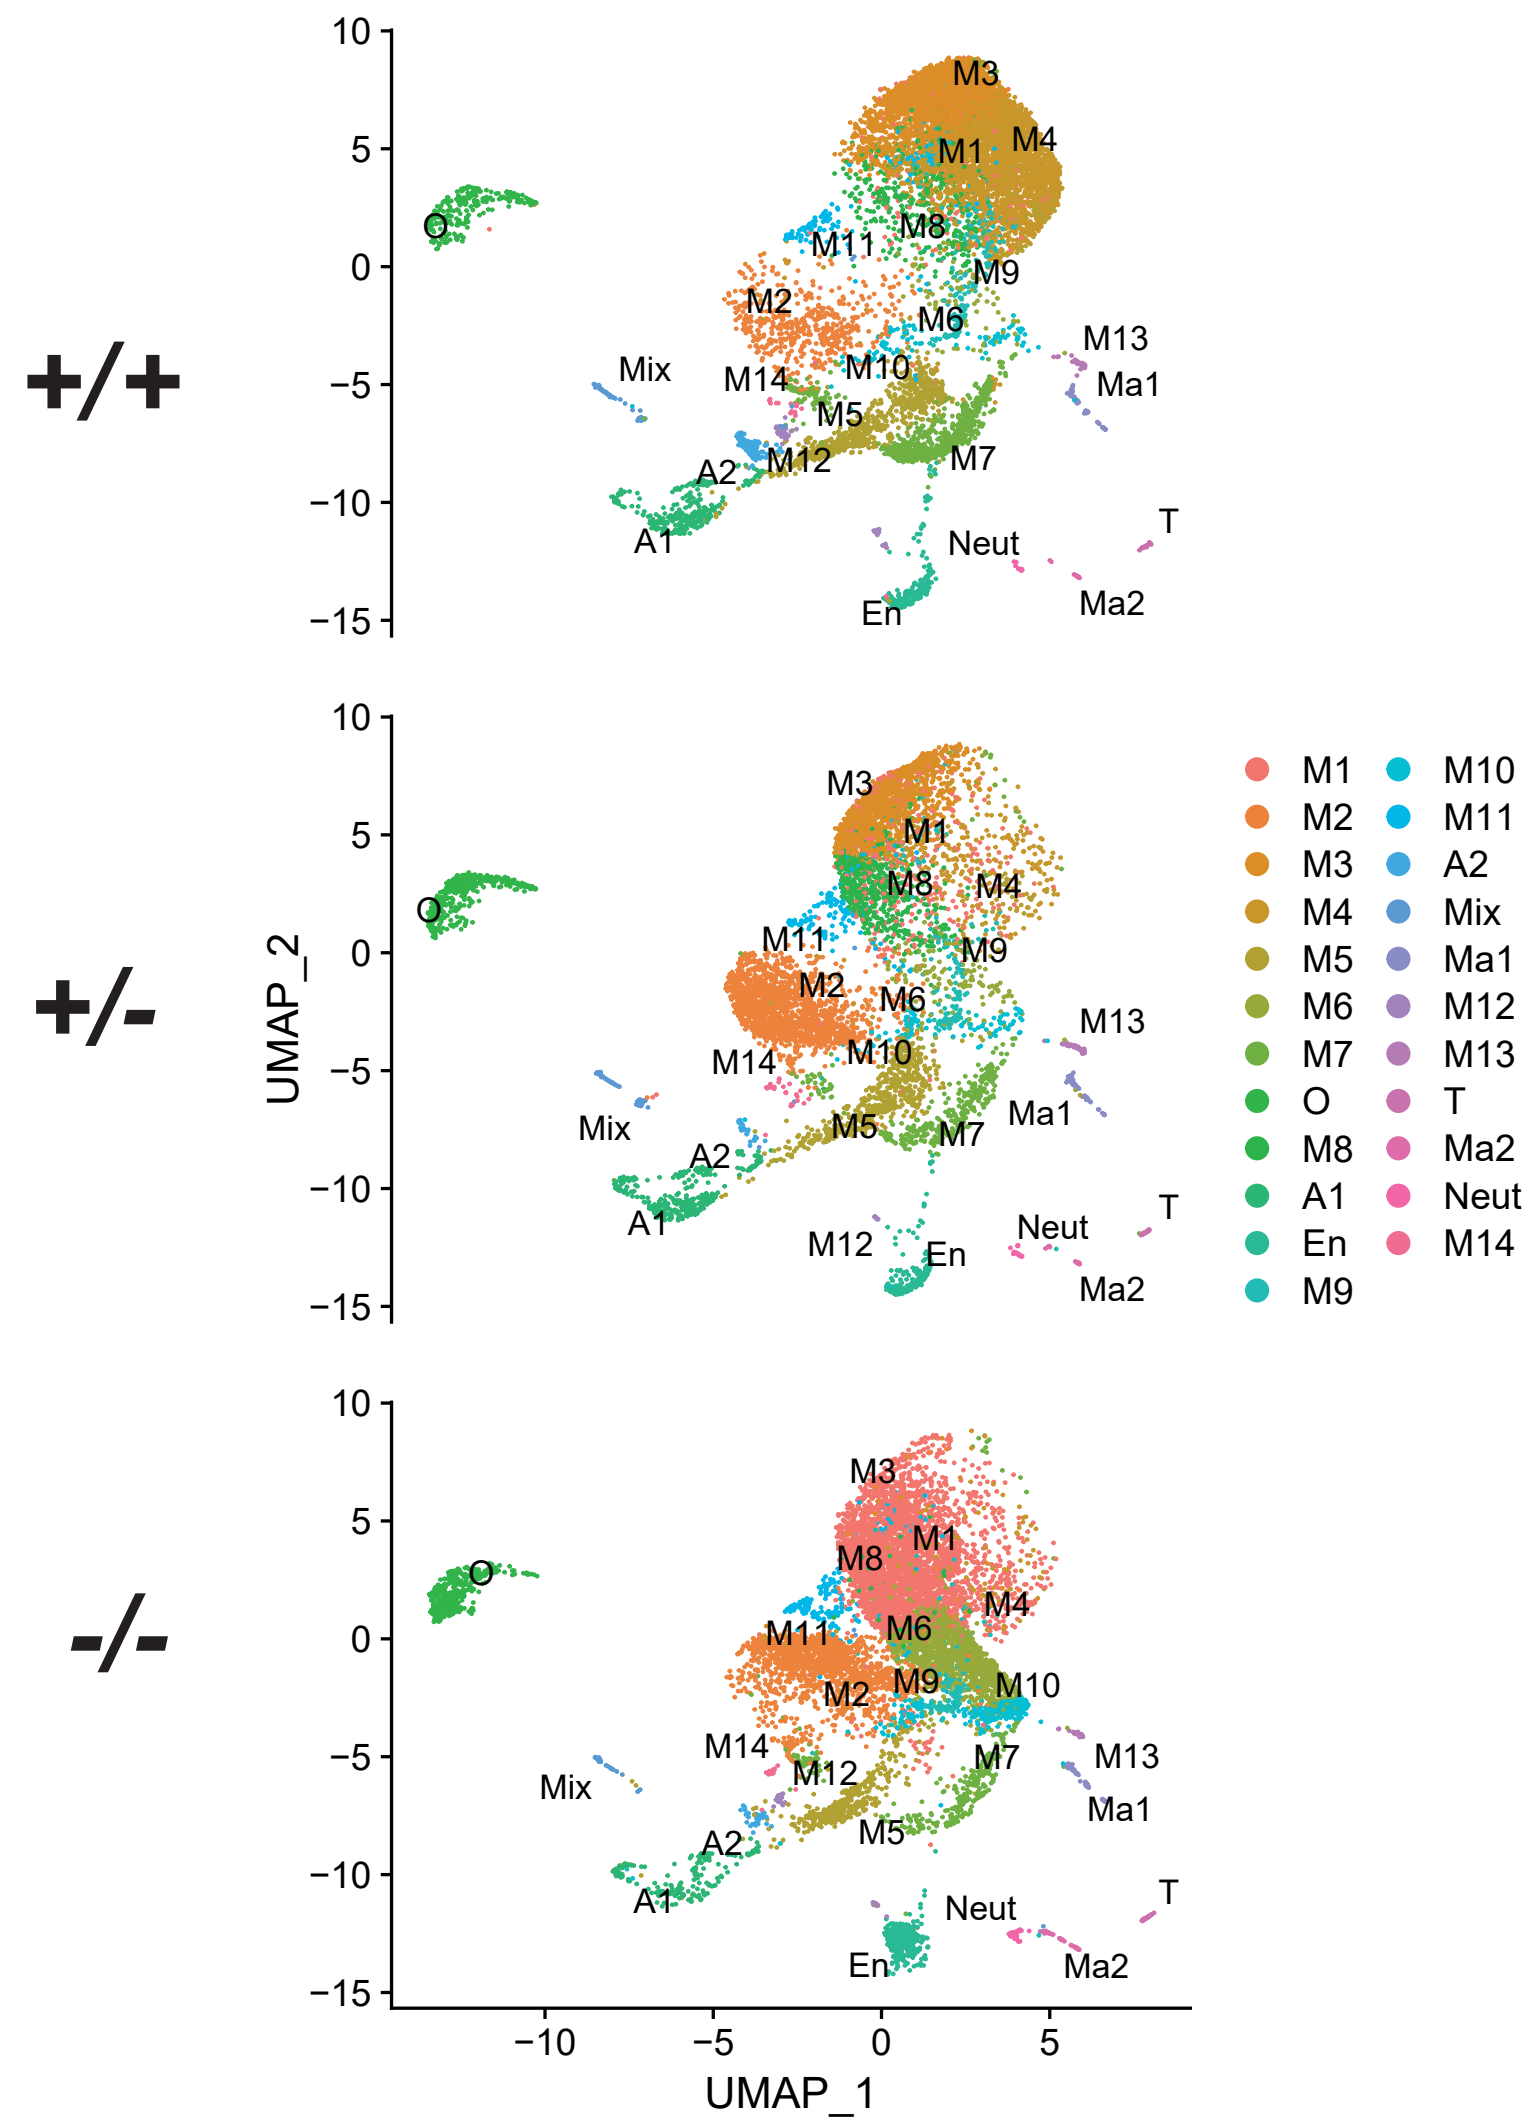**(B)****MALE**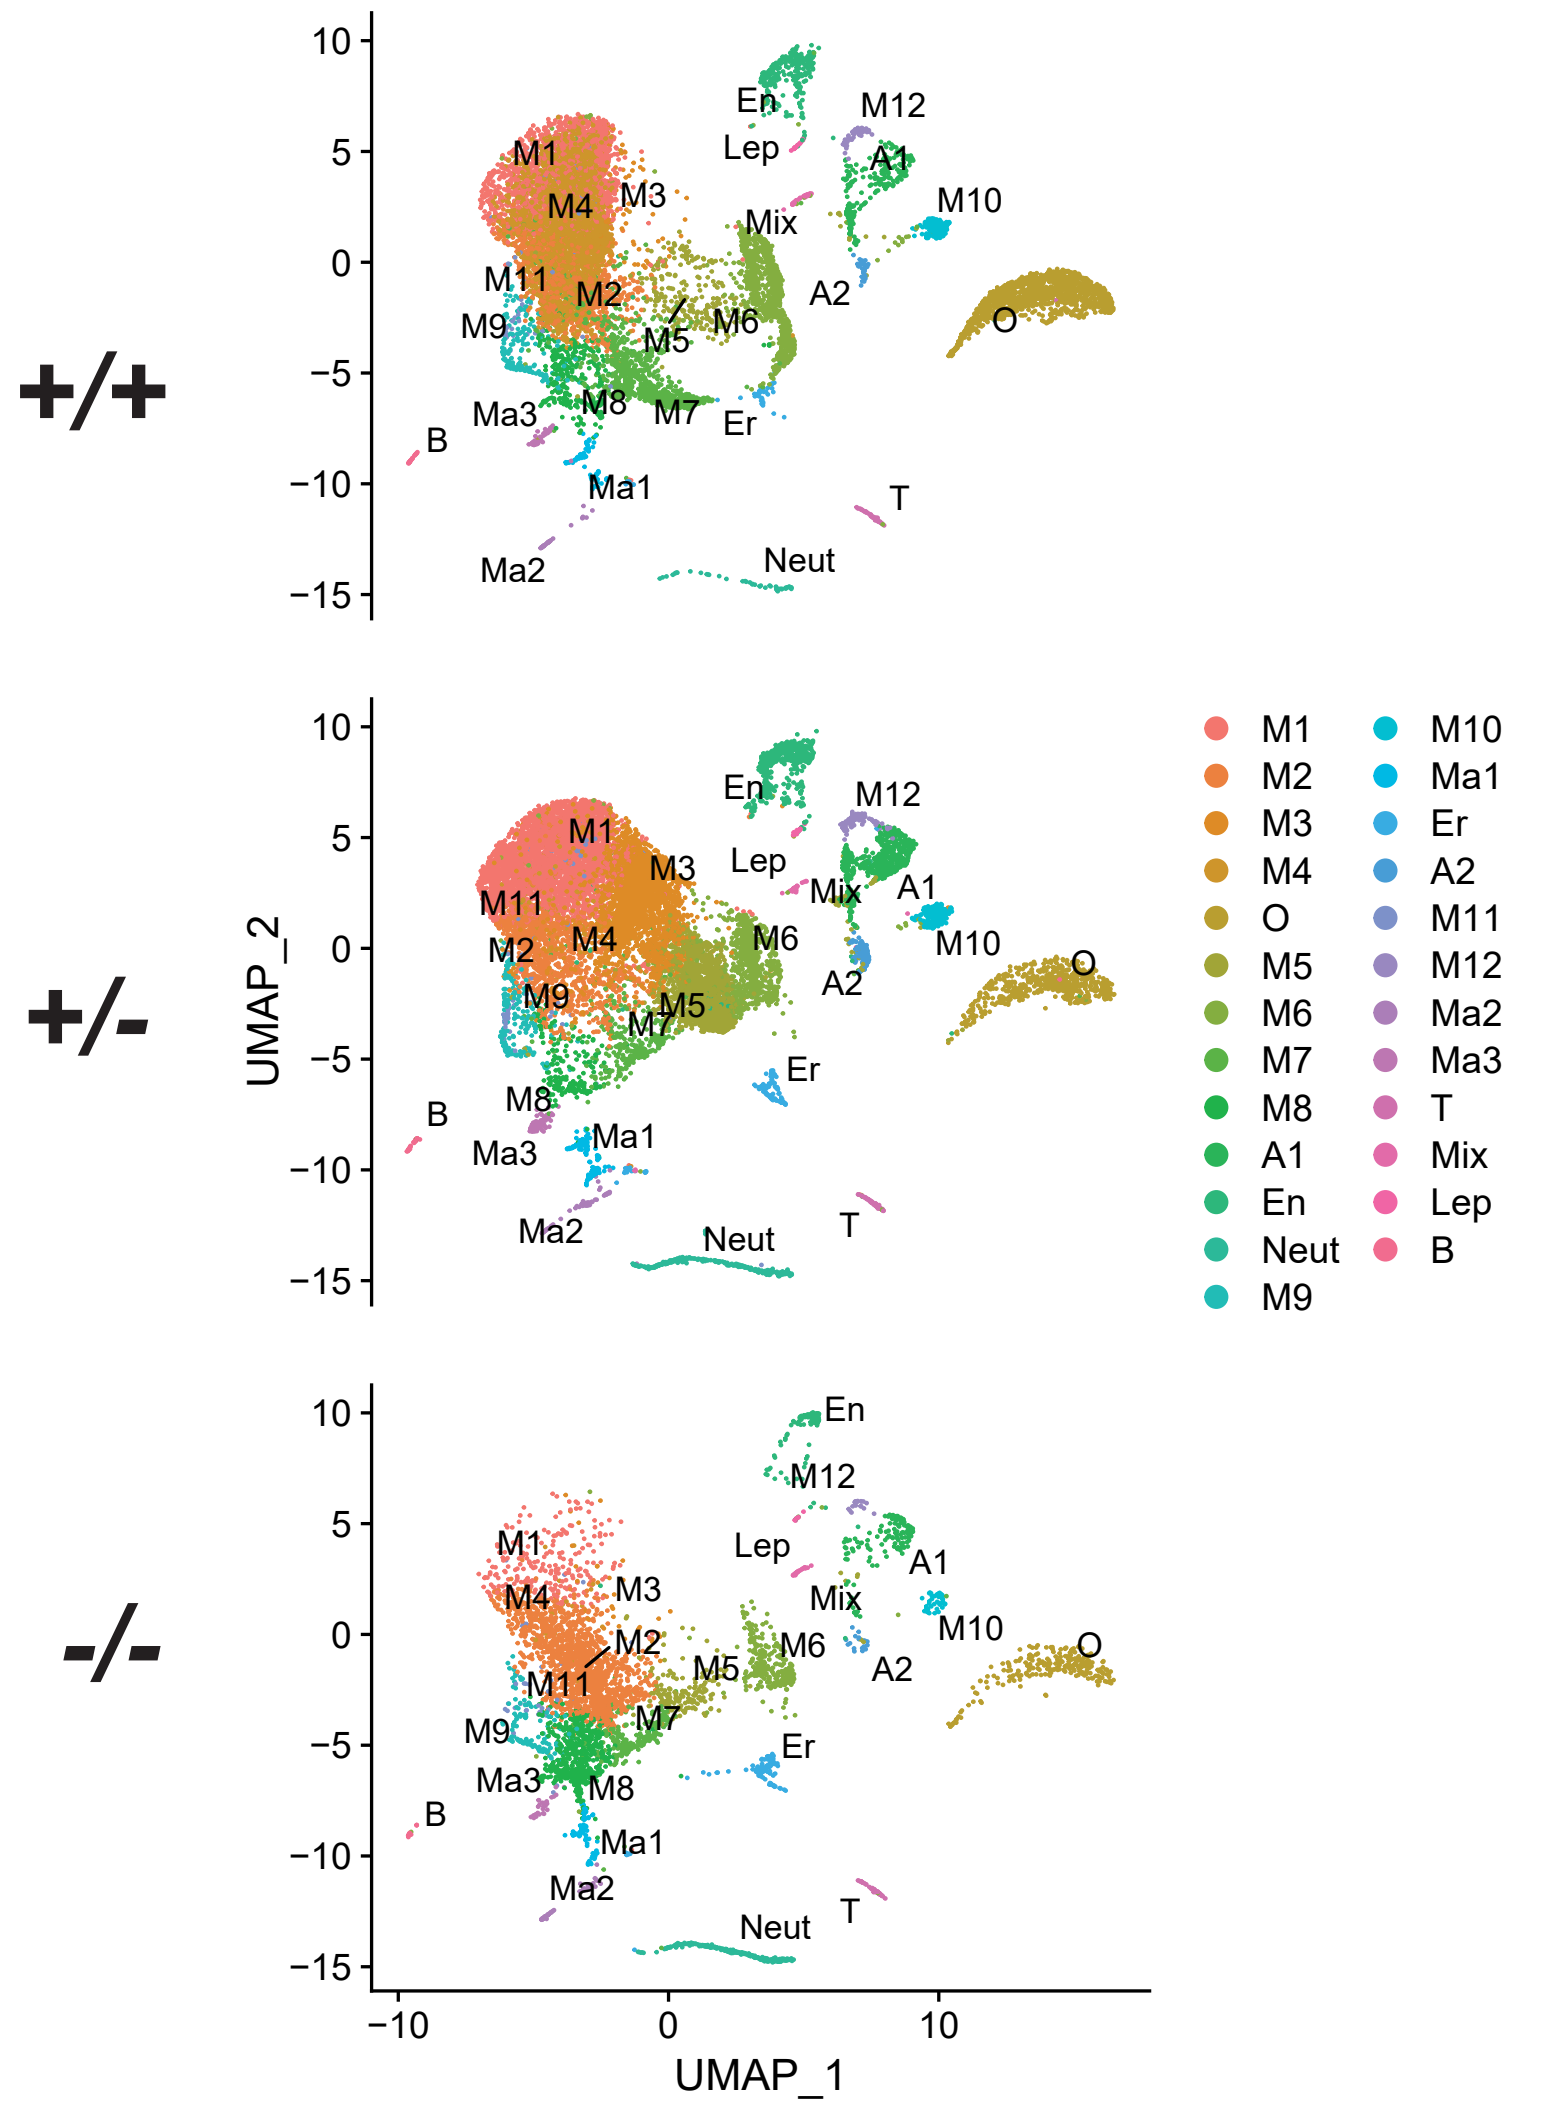

**SUPPLEMENTARY FIGURE 5: UMAPS PER GROUP.** (A) UMAP showing changes in cell distributions between clusters in female *Inpp5d* wildtype (+/+), heterozygous (+/-) and homozygous knockout (-/-) mice. (B) UMAP showing changes in cell distributions between clusters in male *Inpp5d* wildtype (+/+), heterozygous (+/-) and homozygous knockout (-/-) mice. (A = astrocytes, B = B-cells, En = endothelial cells, Er = erythrocytes, Lep = leptomeningeal cells, M = microglia, Ma = macrophage, Mix = mixed cells, Neut = neutrophils, O = oligodendrocytes, T =T-cells)
