# Supplementary material for: Loss of Inpp5d has disease‐relevant and sex‐specific effects on glial transcriptomes
Source: PubMed Central journal article supplement (PMC11350029; doi:10.1002/alz.13901), 2024-06-26
Supplement: ALZ-20-5311-s018.pdf [file ALZ-20-5311-s018.pdf]

# Proportions by Genotype total data

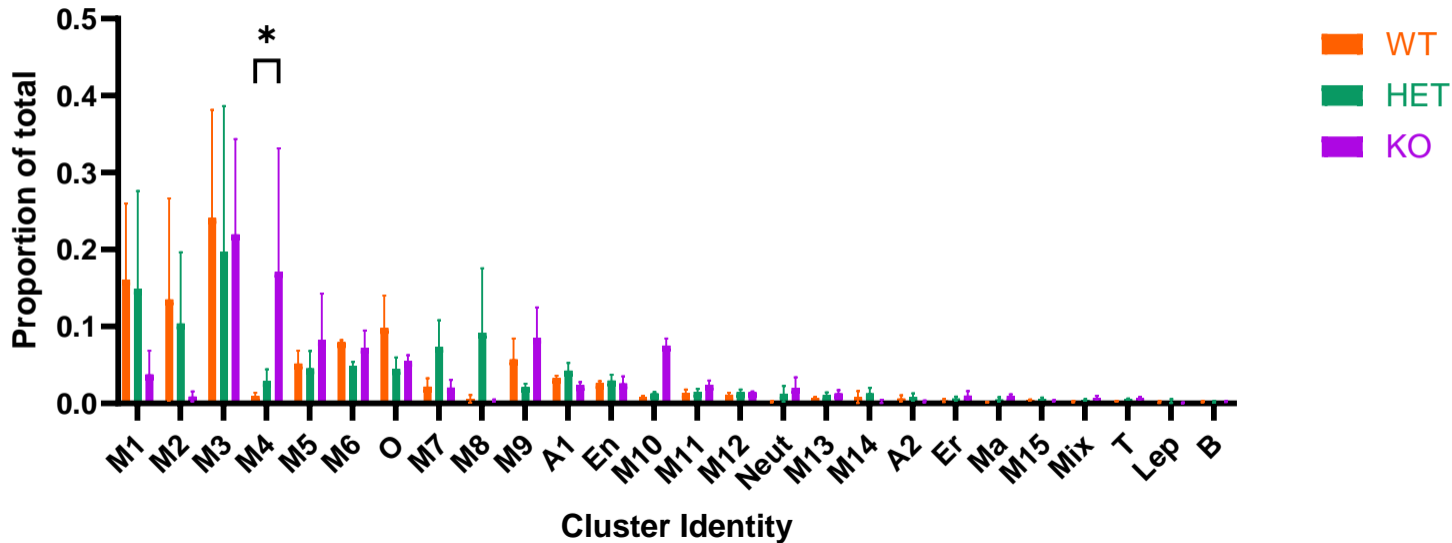

**SUPPLEMENTARY FIGURE 2:** Proportions of cells in each cluster based on *Inpp5d* genotype. ANOVA using Šídák's multiple comparisons test was used to determine nominally significant changes (\* =  $P < 0.05$ , \*\* =  $P < 0.01$ , error bars show SEM).
