# Supplementary material for: Loss of Inpp5d has disease‐relevant and sex‐specific effects on glial transcriptomes
Source: PubMed Central journal article supplement (PMC11350029; doi:10.1002/alz.13901), 2024-06-26
Supplement: ALZ-20-5311-s020.pdf [file ALZ-20-5311-s020.pdf]

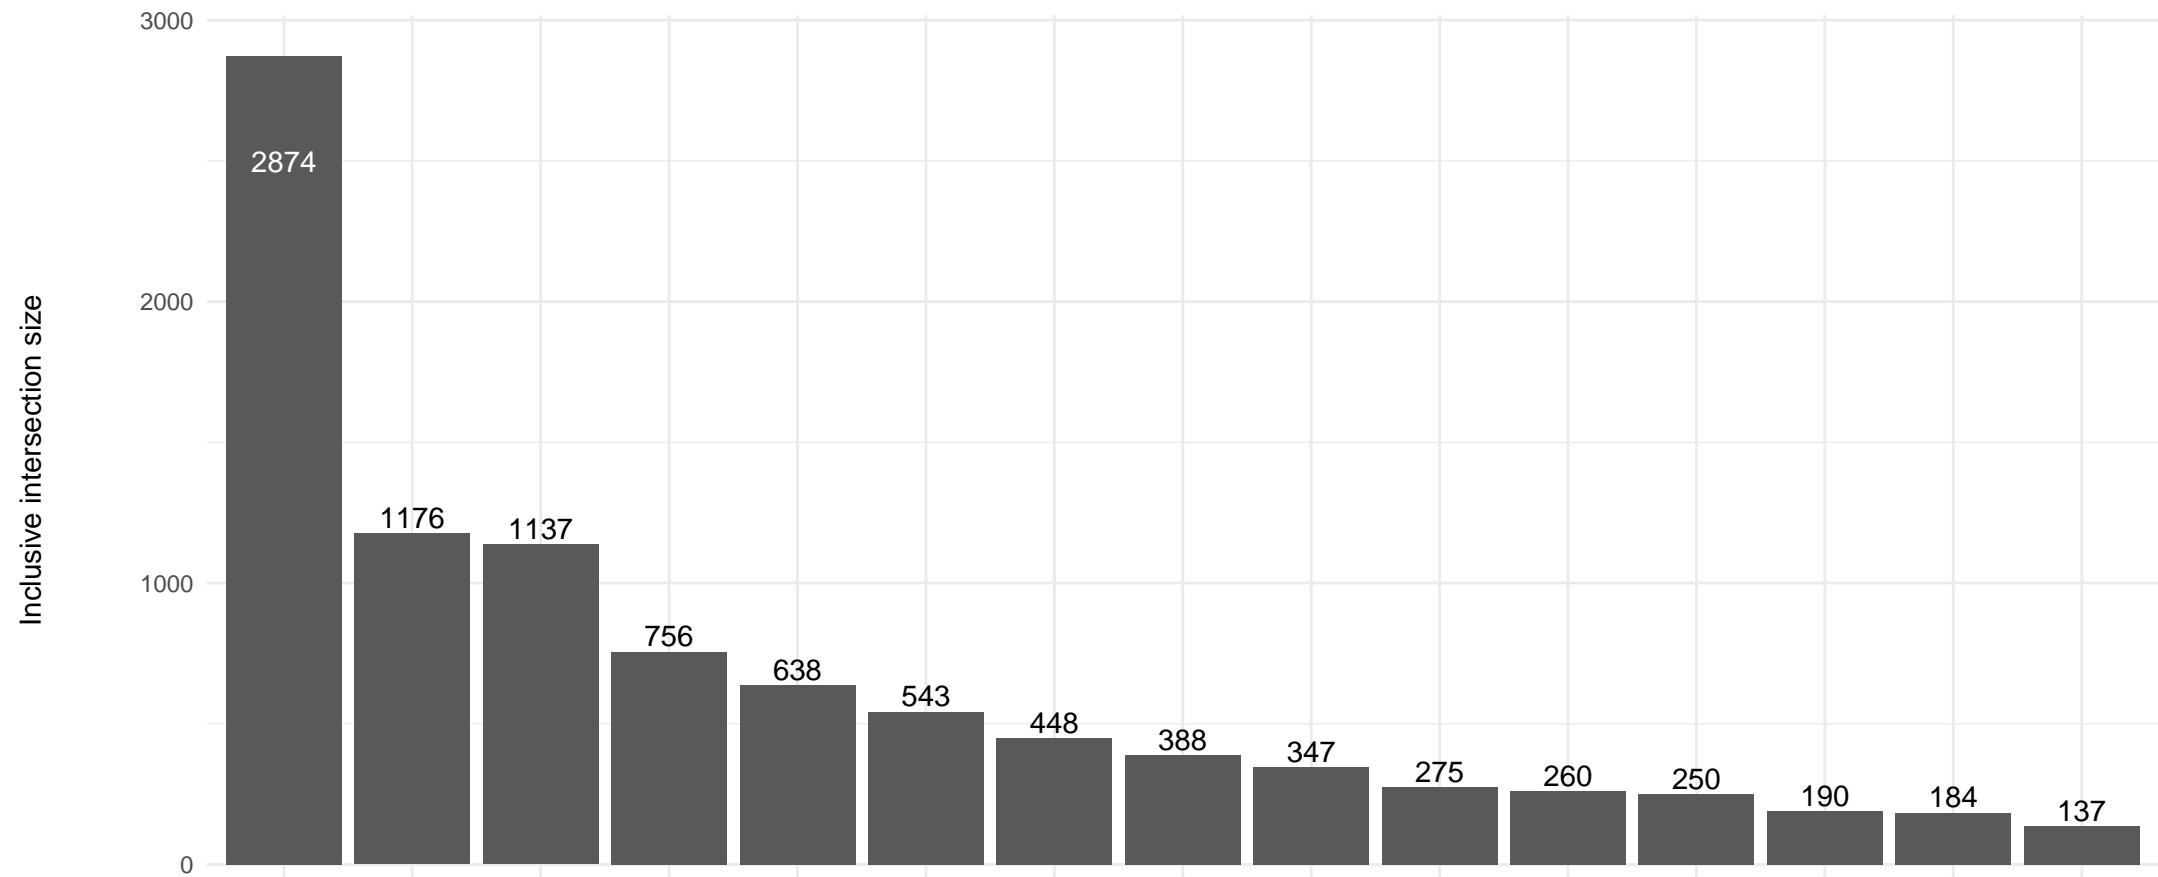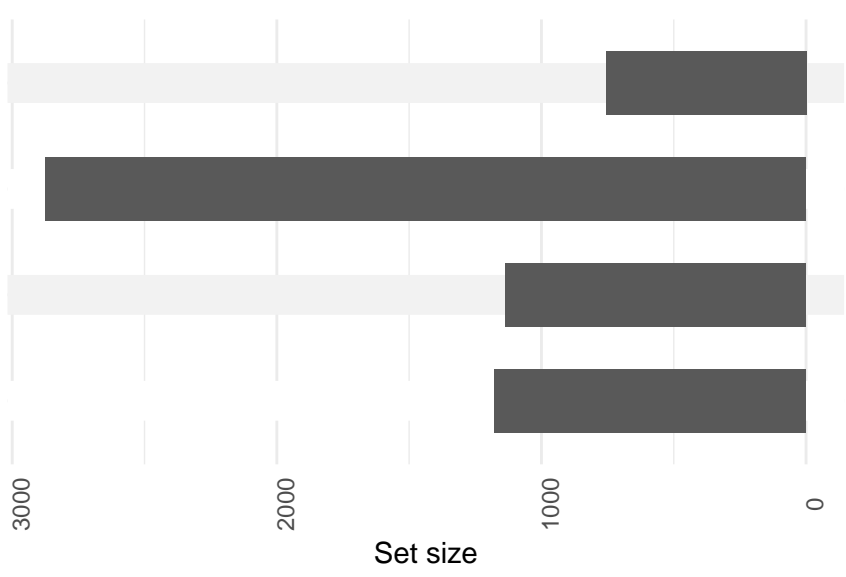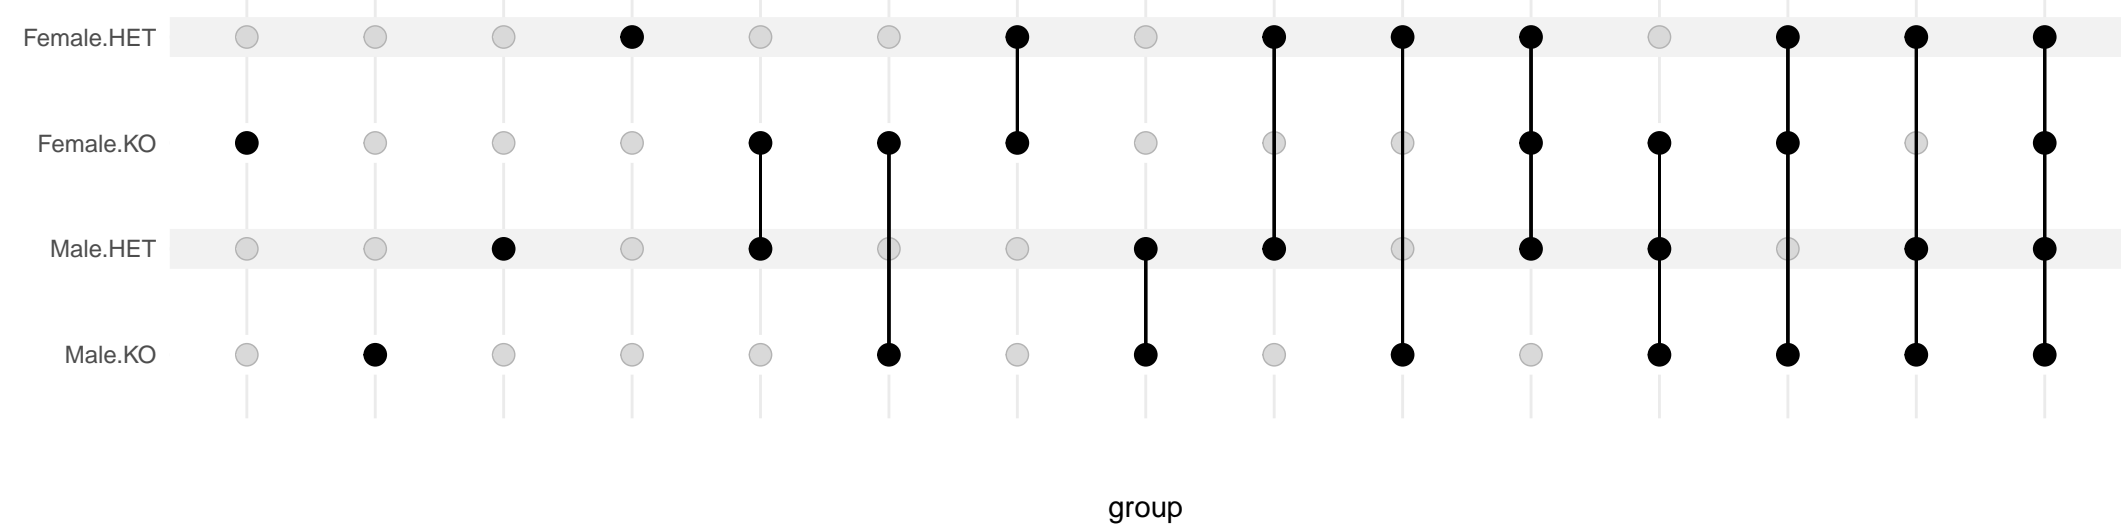

**SUPPLEMENTARY FIGURE 6:** Upset Plot showing the number of unique differentially expressed genes (Set size) across all clusters within each group compared to wildtype and the size of the overlap between all comparisons. Differential expression was determined by Wilcoxon Rank Sum test with Bonferroni adjustment for multiple comparisons (HET = Heterozygous knockout, KO = Homozygous knockout).
